# Supplementary material for: Intestinal Microbial Metabolites Are Linked to Severity of Myocardial Infarction in Rats
Source: PubMed Central journal article supplement (PMC4978455; doi:10.1371/journal.pone.0160840), 2016-08-09
Supplement: pone.0160840.s003.pdf [file pone.0160840.s003.pdf]

| Table 1: Changes in metabolic pathways induced by antibiotic treatment. |                          |      |                |    |                |                      |
|-------------------------------------------------------------------------|--------------------------|------|----------------|----|----------------|----------------------|
| Pathway - Sub-pathway <sup>1</sup>                                      | Metabolites <sup>2</sup> |      |                |    |                |                      |
|                                                                         | Total                    | Down | % <sup>3</sup> | Up | % <sup>3</sup> | Special <sup>4</sup> |
| <b>Amino acid</b>                                                       | 85                       | 56   | 66             | 7  | 8              |                      |
| Glycine, serine and threonine metabolism                                | 7                        | 6    | 86             |    |                |                      |
| Alanine and aspartate metabolism                                        | 7                        | 5    | 71             |    |                |                      |
| Phenylalanine & tyrosine metabolism                                     | 14                       | 12   | 86             |    |                | Phenyllactate (PLA)  |
| Tryptophan metabolism                                                   | 10                       | 6    | 60             | 1  | 10             | Kynurenate           |
| Valine, leucine and isoleucine metabolism                               | 16                       | 10   | 63             | 2  | 13             |                      |
| Cysteine, methionine, SAM, taurine metabolism                           | 5                        | 3    | 60             |    |                |                      |
| <b>Peptide</b>                                                          | 24                       | 12   | 50             | 7  | 29             |                      |
| Gamma-glutamyl                                                          | 9                        | 9    | 100            |    |                |                      |
| Fibrinogen cleavage peptide                                             | 10                       |      |                | 6  | 60             |                      |
| <b>Carbohydrate</b>                                                     | 10                       | 6    | 60             |    |                |                      |
| Fructose, mannose, galactose, starch, and sucrose metabolism            | 3                        | 3    | 100            |    |                |                      |
| Glycolysis, gluconeogenesis, pyruvate metabolism                        | 5                        | 3    | 60             |    |                | Lactate              |
| <b>Energy</b>                                                           | 8                        | 4    | 50             |    |                |                      |
| Krebs cycle                                                             | 6                        | 4    | 67             |    |                |                      |
| <b>Lipid</b>                                                            | 115                      | 26   | 23             | 39 | 34             |                      |
| Essential fatty acid                                                    | 7                        |      |                | 6  | 86             |                      |
| Medium chain fatty acid                                                 | 8                        |      |                | 1  | 13             |                      |
| Long chain fatty acid                                                   | 18                       |      |                | 15 | 83             |                      |
| Fatty acid, monohydroxy                                                 | 4                        | 1    | 25             | 3  | 75             |                      |
| Fatty acid, dicarboxylate                                               | 4                        | 3    | 75             |    |                |                      |
| Carnitine metabolism                                                    | 6                        | 1    | 17             | 3  | 50             |                      |
| Bile acid metabolism                                                    | 11                       | 9    | 82             |    |                |                      |
| Lysolipid                                                               | 32                       | 5    | 16             | 1  | 3              |                      |
| <b>Nucleotide</b>                                                       | 15                       | 9    | 60             | 1  | 7              |                      |
| Pyrimidine metabolism, cytidine containing                              | 5                        | 3    | 60             |    |                |                      |
| <b>Cofactors and vitamins</b>                                           | 10                       | 7    | 70             | 2  | 20             |                      |
| Ascorbate and aldarate metabolism                                       | 3                        | 3    | 100            |    |                |                      |
| <b>Xenobiotics</b>                                                      | 17                       | 9    | 53             | 2  | 12             |                      |
| Benzoate metabolism                                                     | 4                        | 3    | 75             |    |                |                      |
| Food component/Plant                                                    | 6                        | 4    | 67             |    |                |                      |

<sup>1</sup>Each metabolic pathway is divided into selected sub-pathways. Metabolite counts for the pathways are cumulative of all sub-pathways, see Supplement Table 2 for the complete list.

<sup>2</sup>Each of the 284 metabolites are assigned to each sub-pathway. Down indicates metabolites that are reduced by antibiotics and up indicates an increase.

<sup>3</sup>Percent of metabolites in each pathway / sub-pathway that changed at day 7 compared to day 0. Green indicates reduction while red indicates increase.

<sup>4</sup>These three metabolites exhibited opposite changes in direction in response to vancomycin and mixed antibiotic treatments, see text for discussion.
