# Supplementary material for: Intestinal Microbial Metabolites Are Linked to Severity of Myocardial Infarction in Rats
Source: PubMed Central journal article supplement (PMC4978455; doi:10.1371/journal.pone.0160840), 2016-08-09
Supplement: pone.0160840.s004.pdf [file pone.0160840.s004.pdf]

Table 2: Representative metabolites decreased by antibiotic treatments

| PATHWAY <sup>1</sup>                             | SUB-PATHWAY                                | BIOCHEMICAL NAME                          | Vanc 7d                                                      |                      | Mix 7d             |                      |       |
|--------------------------------------------------|--------------------------------------------|-------------------------------------------|--------------------------------------------------------------|----------------------|--------------------|----------------------|-------|
|                                                  |                                            |                                           | Ratio <sup>2</sup>                                           | p-Value <sup>3</sup> | Ratio <sup>2</sup> | p-Value <sup>3</sup> |       |
| Amino acid                                       | Glycine, serine and threonine metabolism   | glycine                                   | 0.76                                                         | 0.013                | 0.85               | 0.126                |       |
|                                                  |                                            | dimethylglycine                           | 0.61                                                         | < 0.001              | 0.66               | < 0.001              |       |
|                                                  |                                            | serine                                    | 0.94                                                         | 0.656                | 0.68               | 0.019                |       |
|                                                  |                                            | threonine                                 | 0.56                                                         | < 0.001              | 0.52               | < 0.001              |       |
|                                                  |                                            | N-acetylthreonine                         | 0.62                                                         | < 0.001              | 0.69               | < 0.001              |       |
|                                                  | Alanine and aspartate metabolism           | betaine                                   | 0.67                                                         | < 0.001              | 0.70               | < 0.001              |       |
|                                                  |                                            | alanine                                   | 0.67                                                         | 0.007                | 0.56               | < 0.001              |       |
|                                                  |                                            | N-acetyl-beta-alanine                     | 0.88                                                         | 0.001                | 0.83               | < 0.001              |       |
|                                                  |                                            | aspartate                                 | 0.63                                                         | 0.005                | 1.00               | 0.912                |       |
|                                                  |                                            | N-acetylaspargate (NAA)                   | 0.72                                                         | 0.086                | 0.55               | 0.007                |       |
|                                                  | Glutamate metabolism                       | 3-ureidopropionate                        | 0.78                                                         | 0.031                | 0.66               | 0.001                |       |
|                                                  |                                            | glutamate                                 | 0.65                                                         | 0.002                | 0.61               | < 0.001              |       |
|                                                  |                                            | glutamine                                 | 0.89                                                         | 0.005                | 0.81               | < 0.001              |       |
|                                                  | Phenylalanine & tyrosine metabolism        | pyroglutamine*                            | 0.36                                                         | < 0.001              | 0.31               | < 0.001              |       |
|                                                  |                                            | phenyllactate (PLA)                       | 1.69                                                         | < 0.001              | 0.14               | < 0.001              |       |
|                                                  |                                            | phenylalanine                             | 0.87                                                         | 0.013                | 0.86               | 0.008                |       |
|                                                  |                                            | phenylacetate                             | 0.78                                                         | 0.046                | 0.84               | 0.137                |       |
|                                                  |                                            | p-cresol sulfate                          | 0.09                                                         | < 0.001              | 0.11               | < 0.001              |       |
|                                                  |                                            | tyrosine                                  | 0.95                                                         | 0.193                | 0.88               | 0.003                |       |
|                                                  |                                            | 3-(4-hydroxyphenyl)lactate                | 0.95                                                         | 0.307                | 0.81               | < 0.001              |       |
|                                                  |                                            | 4-hydroxyphenylpyruvate                   | 0.72                                                         | 0.025                | 1.05               | 0.719                |       |
|                                                  |                                            | N-acetyltyrosine                          | 0.93                                                         | 0.367                | 0.82               | 0.013                |       |
|                                                  |                                            | phenylacetylglutamate                     | 0.19                                                         | < 0.001              | 0.93               | 0.942                |       |
|                                                  |                                            | 2-(4-hydroxyphenyl)propionate             | 0.22                                                         | < 0.001              | 0.17               | < 0.001              |       |
|                                                  |                                            | 3-(3-hydroxyphenyl)propionate             | 0.54                                                         | 0.045                | 0.35               | 0.024                |       |
|                                                  | Tryptophan metabolism                      | 3-phenylpropionate (hydrocinnamate)       | 0.36                                                         | < 0.001              | 0.35               | < 0.001              |       |
|                                                  |                                            | phenol sulfate                            | 0.04                                                         | < 0.001              | 0.03               | < 0.001              |       |
|                                                  |                                            | kynurenate                                | 0.81                                                         | 0.005                | 1.21               | 0.016                |       |
|                                                  |                                            | kynurenine                                | 0.79                                                         | < 0.001              | 0.86               | 0.006                |       |
|                                                  |                                            | indoleacetate                             | 0.54                                                         | < 0.001              | 0.64               | 0.003                |       |
|                                                  |                                            | serotonin (5HT)                           | 3.11                                                         | < 0.001              | 0.85               | 0.657                |       |
|                                                  |                                            | N-acetyltryptophan                        | 0.74                                                         | 0.017                | 0.75               | 0.014                |       |
|                                                  |                                            | C-glycosyltryptophan*                     | 0.87                                                         | 0.004                | 0.89               | 0.009                |       |
|                                                  |                                            | 3-indoxyl sulfate                         | 0.66                                                         | 0.077                | 0.47               | 0.001                |       |
|                                                  |                                            | indolepropionate                          | 0.37                                                         | < 0.001              | 0.44               | < 0.001              |       |
|                                                  |                                            | Valine, leucine and isoleucine metabolism | 3-methyl-2-oxobutyrate                                       | 0.82                 | 0.040              | 0.98                 | 0.815 |
|                                                  |                                            |                                           | 3-methyl-2-oxovalerate                                       | 0.71                 | 0.010              | 0.80                 | 0.253 |
|                                                  | beta-hydroxyisovalerate                    |                                           | 1.10                                                         | 0.327                | 1.51               | 0.007                |       |
|                                                  | isoleucine                                 |                                           | 0.81                                                         | 0.003                | 0.91               | 0.101                |       |
|                                                  | leucine                                    |                                           | 0.84                                                         | < 0.001              | 0.92               | 0.033                |       |
|                                                  | N-acetylleucine                            |                                           | 0.94                                                         | 0.391                | 0.82               | 0.020                |       |
|                                                  | valine                                     |                                           | 0.92                                                         | 0.040                | 1.01               | 0.807                |       |
|                                                  | 2-hydroxyisobutyrate                       |                                           | 0.72                                                         | < 0.001              | 0.63               | < 0.001              |       |
|                                                  | 3-hydroxyisobutyrate                       |                                           | 0.70                                                         | 0.007                | 0.81               | 0.179                |       |
|                                                  | alpha-hydroxyisovalerate                   |                                           | 1.71                                                         | < 0.001              | 0.81               | 0.057                |       |
| isovalerylglutamate                              | 0.80                                       |                                           | 0.031                                                        | 0.84                 | 0.075              |                      |       |
| 2-methylbutyrylcarnitine                         | 0.87                                       |                                           | 0.036                                                        | 1.07                 | 0.253              |                      |       |
| Cysteine, methionine, SAM, taurine metabolism    | methionine                                 |                                           | 0.84                                                         | < 0.001              | 0.81               | < 0.001              |       |
|                                                  | N-acetylmethionine                         |                                           | 0.81                                                         | < 0.001              | 0.72               | < 0.001              |       |
|                                                  | 2-hydroxybutyrate (AHB)                    |                                           | 0.47                                                         | < 0.001              | 0.56               | < 0.001              |       |
| Peptide                                          | gamma-glutamyl                             | gamma-glutamylvaline                      | 0.78                                                         | < 0.001              | 0.89               | 0.069                |       |
|                                                  |                                            | gamma-glutamylleucine                     | 0.76                                                         | < 0.001              | 0.89               | 0.043                |       |
|                                                  |                                            | gamma-glutamylisoleucine*                 | 0.80                                                         | 0.002                | 0.80               | 0.002                |       |
|                                                  |                                            | gamma-glutamylmethionine                  | 0.72                                                         | 0.004                | 0.67               | 0.002                |       |
|                                                  |                                            | gamma-glutamylglutamine                   | 0.74                                                         | < 0.001              | 0.70               | < 0.001              |       |
|                                                  |                                            | gamma-glutamylphenylalanine               | 0.75                                                         | < 0.001              | 0.75               | < 0.001              |       |
|                                                  |                                            | gamma-glutamyltyrosine                    | 0.78                                                         | < 0.001              | 0.75               | < 0.001              |       |
|                                                  |                                            | gamma-glutamylthreonine*                  | 0.61                                                         | < 0.001              | 0.47               | < 0.001              |       |
|                                                  |                                            | gamma-glutamylalanine                     | 0.74                                                         | < 0.001              | 0.72               | < 0.001              |       |
|                                                  |                                            | Carbohydrate                              | Fructose, mannose, galactose, starch, and sucrose metabolism | fructose             | 0.59               | < 0.001              | 0.61  |
| mannitol                                         | 0.92                                       |                                           |                                                              | 0.843                | 0.06               | < 0.001              |       |
| mannose                                          | 0.87                                       |                                           |                                                              | 0.132                | 0.72               | 0.003                |       |
| Glycolysis, gluconeogenesis, pyruvate metabolism | 1,5-anhydroglucitol (1,5-AG)               |                                           | 0.53                                                         | < 0.001              | 0.49               | < 0.001              |       |
|                                                  | glycerate                                  |                                           | 0.69                                                         | 0.046                | 0.81               | 0.195                |       |
|                                                  | glucose                                    |                                           | 0.71                                                         | 0.003                | 0.67               | < 0.001              |       |
| Energy                                           | Krebs cycle                                | lactate                                   | 0.63                                                         | 0.005                | 1.39               | 0.037                |       |
|                                                  |                                            | citrate                                   | 0.68                                                         | < 0.001              | 0.71               | < 0.001              |       |
| Nucleotide                                       | Pyrimidine metabolism, cytidine containing | cis-aconitate                             | 0.69                                                         | < 0.001              | 0.64               | < 0.001              |       |
|                                                  |                                            | succinate                                 | 0.37                                                         | < 0.001              | 0.66               | 0.035                |       |
|                                                  |                                            | malate                                    | 0.48                                                         | < 0.001              | 0.58               | < 0.001              |       |
|                                                  |                                            | cytidine                                  | 0.88                                                         | 0.054                | 0.81               | 0.003                |       |
|                                                  |                                            | 5-methylcytidine                          | 0.91                                                         | 0.018                | 0.87               | < 0.001              |       |
| Cofactors and vitamins                           | Ascorbate and aldarate metabolism          | 2'-deoxycytidine                          | 0.94                                                         | 0.010                | 0.89               | < 0.001              |       |
|                                                  |                                            | uracil                                    | 0.67                                                         | 0.012                | 0.99               | 0.999                |       |
|                                                  |                                            | uridine                                   | 0.81                                                         | < 0.001              | 0.83               | < 0.001              |       |
|                                                  |                                            | pseudouridine                             | 0.98                                                         | 0.370                | 0.93               | 0.013                |       |
|                                                  |                                            | gulono-1,4-lactone                        | 0.51                                                         | 0.003                | 0.58               | 0.005                |       |
| Xenobiotics                                      | Benzoate metabolism                        | ascorbate (Vitamin C)                     | 0.55                                                         | 0.184                | 0.38               | 0.030                |       |
|                                                  |                                            | threonate                                 | 0.55                                                         | < 0.001              | 0.42               | < 0.001              |       |
|                                                  |                                            | hippurate                                 | 0.06                                                         | < 0.001              | 0.06               | < 0.001              |       |
| Lipid                                            | Fatty acid, dicarboxylate                  | catechol sulfate                          | 0.03                                                         | < 0.001              | 0.02               | < 0.001              |       |
|                                                  |                                            | 4-ethylphenylsulfate                      | 0.08                                                         | < 0.001              | 0.08               | < 0.001              |       |
|                                                  |                                            | indoleacrylate                            | 0.43                                                         | < 0.001              | 0.48               | < 0.001              |       |
|                                                  | Bile acid metabolism                       | cinnamate                                 | 0.48                                                         | < 0.001              | 0.35               | < 0.001              |       |
|                                                  |                                            | stachydrine                               | 0.59                                                         | < 0.001              | 0.62               | < 0.001              |       |
|                                                  |                                            | homostachydrine*                          | 0.47                                                         | < 0.001              | 0.50               | < 0.001              |       |
|                                                  |                                            | 2-hydroxyglutarate                        | 0.51                                                         | 0.013                | 0.94               | 0.495                |       |
| Lipid                                            | Bile acid metabolism                       | tetradecanedioate                         | 0.81                                                         | 0.032                | 0.97               | 0.861                |       |
|                                                  |                                            | hexadecanedioate                          | 0.75                                                         | 0.029                | 0.72               | 0.014                |       |
|                                                  |                                            | cholate                                   | 0.01                                                         | < 0.001              | 0.00               | < 0.001              |       |
|                                                  |                                            | 12-dehydrocholate                         | 0.07                                                         | < 0.001              | 0.07               | < 0.001              |       |
|                                                  |                                            | glycocholate                              | 0.03                                                         | < 0.001              | 0.06               | < 0.001              |       |
|                                                  |                                            | taurocholate                              | 0.66                                                         | 0.127                | 0.41               | 0.005                |       |
|                                                  |                                            | 3-dehydrocholate                          | 0.30                                                         | 0.017                | 0.47               | 0.108                |       |
|                                                  |                                            | deoxycholate                              | 0.14                                                         | < 0.001              | 0.21               | 0.003                |       |
|                                                  |                                            | taurodeoxycholate                         | 0.42                                                         | < 0.001              | 0.50               | 0.001                |       |
|                                                  |                                            | beta-muricholate                          | 0.01                                                         | < 0.001              | 0.04               | < 0.001              |       |
| alpha-muricholate                                | 0.13                                       | 0.024                                     | 0.17                                                         | 0.040                |                    |                      |       |

<sup>1</sup> Comprehensive list of all pathways are shown in supplement table 1.

<sup>2</sup> Change reflected as ratio of 7 days (7d) relative to day 0 (0d, prior to antibiotic treatment). Vanc - vancomycin, Mix - mixed antibiotics.

<sup>3</sup> Significance indicated by repeated measure ANOVA test.
