# Supplementary material for: Intestinal Microbial Metabolites Are Linked to Severity of Myocardial Infarction in Rats
Source: PubMed Central journal article supplement (PMC4978455; doi:10.1371/journal.pone.0160840), 2016-08-09
Supplement: pone.0160840.s005.pdf [file pone.0160840.s005.pdf]

Table 3. Primer sets specific for 16S and 18S rRNA, reaction temperature and reference strains

| Kingdom  | Phylum            | Class          | Taxonomy Order        | Family              | Genus                  | Species     | Primer ID                  | Temp        | Control sp.                        | Catalog            | Frame                 | Forward                | Reverse                | Clonion           |                             |                  |                  |                     |                        |                     |                             |                       |    |
|----------|-------------------|----------------|-----------------------|---------------------|------------------------|-------------|----------------------------|-------------|------------------------------------|--------------------|-----------------------|------------------------|------------------------|-------------------|-----------------------------|------------------|------------------|---------------------|------------------------|---------------------|-----------------------------|-----------------------|----|
| Bacteria | Actinobacteria    | Actinobacteria | Bifidobacteriales (2) |                     | Bifidobacteriaceae (2) |             | Mammalia Bacteria          | 63          | Ruminococcus productus             | ATCC 7740D-5       | UlrF340               | ACTCTACGCGAGGCGACAGT   | UlrR14                 | ATTACCGCGCTGTGGC  | 10                          |                  |                  |                     |                        |                     |                             |                       |    |
|          |                   |                |                       |                     |                        |             |                            | 59          | Bifidobacterium oryngim - infantis | ATCC 1687D-3       | BifF 143              | CTCTCGGAAAGGGTGGT      | UlrR338                | GCTGCTCCGATAGGAGT | 10                          |                  |                  |                     |                        |                     |                             |                       |    |
|          | Fusobacteria (12) | Bacteroidia    | Bacteroidales (136)   | Bacteroidaceae (15) | Bacteroides (45)       |             | Bacteroidales              | 61          | Bacteroides fragilis               | ATCC 25265D        | BactF265              | GGTCTCTGAGAGGAGTCC     | UlrR338                | GOTGCTCCGATAGGAGT | 10                          |                  |                  |                     |                        |                     |                             |                       |    |
|          |                   |                |                       |                     |                        |             |                            | Ermicutes   | Bacilli (62)                       | Bacillales (18)    | Bacillaceae (14)      | Bacillus (15)          | Bacilli                | 56                | Lactobacillus acidophilus   | ATCC 4357D-5     | LactF362         | AGCAGTAGGGAATCTTCCA | LactR877               | CACCCTACTACA TEGAG  | 10                          |                       |    |
|          | 57.5              | S. aureus      | ATCC 700690D-5        | g-StaphF            | TTTGGGCTACACAGCTGCTACA | g-StaphR    | AACAACITTTATGSGATTTGCM TGA |             |                                    |                    |                       |                        |                        | 18                |                             |                  |                  |                     |                        |                     |                             |                       |    |
|          | Fungi             | Ascomycota     | Eurotiomycetes        | Eurotiiales         | Trichocomaceae         | Aspergillus | Aspergillus                | Aspergillus | 60                                 | M. pneumoniae      | ATCC 16531D           | GPO-3                  | GGGAGCAACAGGATGATGATAC | GMSO              | TECACCATCTGCTCACTCTGTTAACTC | 22               |                  |                     |                        |                     |                             |                       |    |
|          |                   |                |                       |                     |                        |             |                            |             | Mollicutes                         | Mollicutes (42)    | Mollicutes (42)       | Mycoplasmataceae       | Mycoplasma             | Mollicutes        | 60                          | M. pneumoniae    | ATCC 16531D      | GPO-3               | GGGAGCAACAGGATGATGATAC | GMSO                | TECACCATCTGCTCACTCTGTTAACTC | 22                    |    |
|          |                   |                |                       |                     |                        |             |                            |             |                                    |                    |                       |                        |                        |                   | 67                          | Escherichia coli | ATCC 10798D-5    | UlrF15F             | GTGCCAGTGGCGCCGGTAA    | EntR26R             | GCTCAAGGGCAACACCTCCAG       | 10                    |    |
|          |                   |                |                       |                     |                        |             |                            |             | Protobacteria (124)                | Bacteroidetes (19) | Gemmatimonadetes (74) | Entomobacteriales (61) | Entomobacteriaceae     | Escherichia       | Protobacteria               | 67               | Escherichia coli | ATCC 10798D-5       | UlrF15F                | GTGCCAGTGGCGCCGGTAA | EntR26R                     | GCTCAAGGGCAACACCTCCAG | 10 |
|          |                   |                |                       |                     |                        |             |                            |             |                                    |                    |                       |                        |                        |                   |                             | 67               | Escherichia coli | ATCC 10798D-5       | UlrF15F                | GTGCCAGTGGCGCCGGTAA | EntR26R                     | GCTCAAGGGCAACACCTCCAG | 10 |
| Fungi    |                   |                |                       |                     |                        |             |                            |             | Ascomycota                         | Saccharomycetes    | Saccharomycetales     | Saccharomycetaceae     | Saccharomyces          | Candida           | 57                          | C. albicans      | ATCC 14633D      | CandideF            | TGGATCGATGAAAGACGACAGC | CandideR            | TCCTTCCCGCTATTGATATGC       | 13                    |    |
|          |                   |                |                       |                     |                        |             |                            |             |                                    |                    |                       |                        |                        |                   | 54                          | S. cerevisiae    | ATCC 9783D       | Sacc-F              | ATTGCTGGCTTTTCAATG     | Sacc-R              | CGCTAGACGCTCTCTGTAT         | 15                    |    |
| Fungi    |                   |                |                       |                     |                        |             |                            |             | Ascomycota                         | Eurotiomycetes     | Eurotiiales           | Trichocomaceae         | Aspergillus            | Aspergillus       | 55                          | A. flavus        | ATCC 8643D-2     | AspF                | CTGTAGTGGGGAGTCAAAATC  | AspR                | AACAACCTGACCTTCGCGTGA       | 16                    |    |
|          |                   |                |                       |                     |                        |             |                            |             |                                    |                    |                       |                        |                        |                   | 60                          | E. intestinalis  | ATCC 50651       | ProtF(V1)           | CACCGATGATCTGCTGAC     | ProtR(PMP-2)        | CCTCCGGAAACAAACCCCTG        | 19, 20                |    |
| Archaea  |                   |                |                       |                     |                        |             |                            |             | Euryarchaeota (3)                  | Methanobacteria    | Methanobacteriales    | Methanobacteriaceae    | Methanobacter          | Methanobacter     | 57                          | M. smithii       | Dr. Jeff Gordon  | MsmithF             | CCGGGTA TCTATCTCCGGTTC | MsmithR             | CTCCCAAGGATAGGATGAAA        | 14                    |    |
